# Supplementary material for: Differential Roles of the Calcium Ion Channel TRPV4 in Host Responses to Mycobacterium tuberculosis Early and Late in Infection
Source: PubMed Central journal article supplement — iScience. 2020 May 27;23(6):101206. doi: 10.1016/j.isci.2020.101206 (PMC7300151; doi:10.1016/j.isci.2020.101206), 2020-05-27
Supplement: mmc1.pdf [file mmc1.pdf]

iScience, Volume 23

## **Supplemental Information**

### **Differential Roles of the Calcium Ion Channel TRPV4**

**in Host Responses to *Mycobacterium tuberculosis***

#### **Early and Late in Infection**

**Sumanta Kumar Naik, Kaliprasad Pattanaik, Jacqueline Eich, Vivien Sparr, Matthias Hauptmann, Barbara Kalsdorf, Norbert Reiling, Wolfgang Liedtke, Wolfgang M. Kuebler, Ulrich E. Schaible, and Avinash Sonawane**

**Figure S1** Related to Figure 1

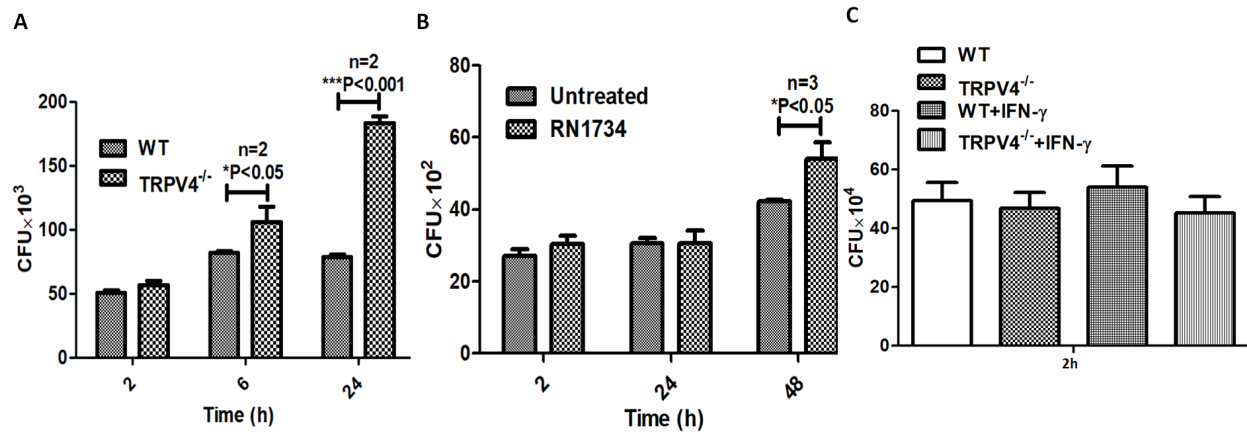

**Figure S1.**

(A) BMDM from WT and *Trpv4*<sup>-/-</sup> macrophages were infected with *M. smegmatis* (Msm) at a MOI 1 and intracellular bacterial counts were assessed by CFU at indicated time points p.i. (B) RAW264.7 macrophages were treated with the Trpv4 inhibitor, RN1734 (10 $\mu$ M), prior to *M. tuberculosis* infection of a MOI1. Intracellular mycobacterial counts were assessed at indicated time points by CFU assay. (C) BMDM from WT and *Trpv4*<sup>-/-</sup> mice were infected with *M. tuberculosis* at MOI 5 and the numbers of phagocytosed *M. tuberculosis* were assessed by CFU at 2h p.i. Data represent the mean  $\pm$  SEM from 2 - 3 (n) independent experiments. Statistical analysis was performed with Two Way ANOVA Bonferroni posttests. \*P < 0.05, \*\*\*P < 0.001.

**Figure S2** Related to Figure 2

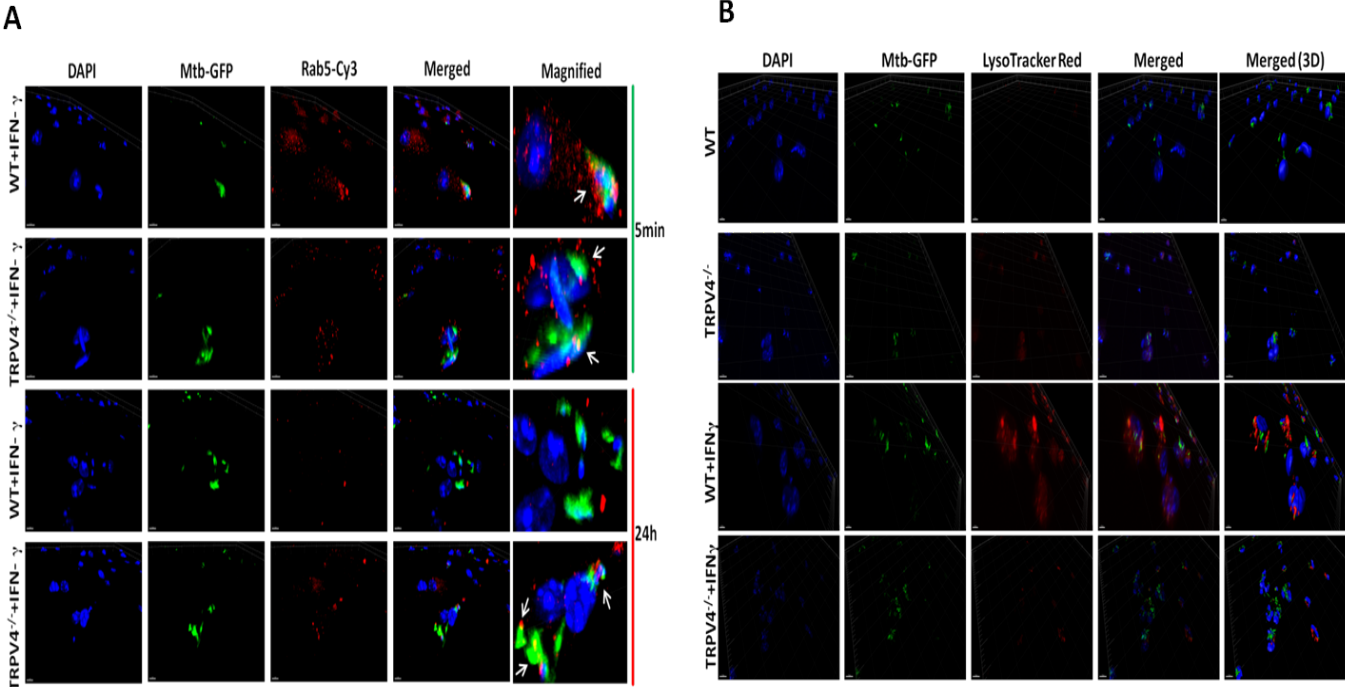

**Figure S2**

(A) Images showing different image channels for nuclei, *M. tuberculosis* and Rab5 as shown in Fig. 2A. (B) Images showing different image channels for nuclei, *M. tuberculosis* and lysotracker as shown in Fig. 2C.

**Figure S3 Related to Figure 4 and Figure 5**

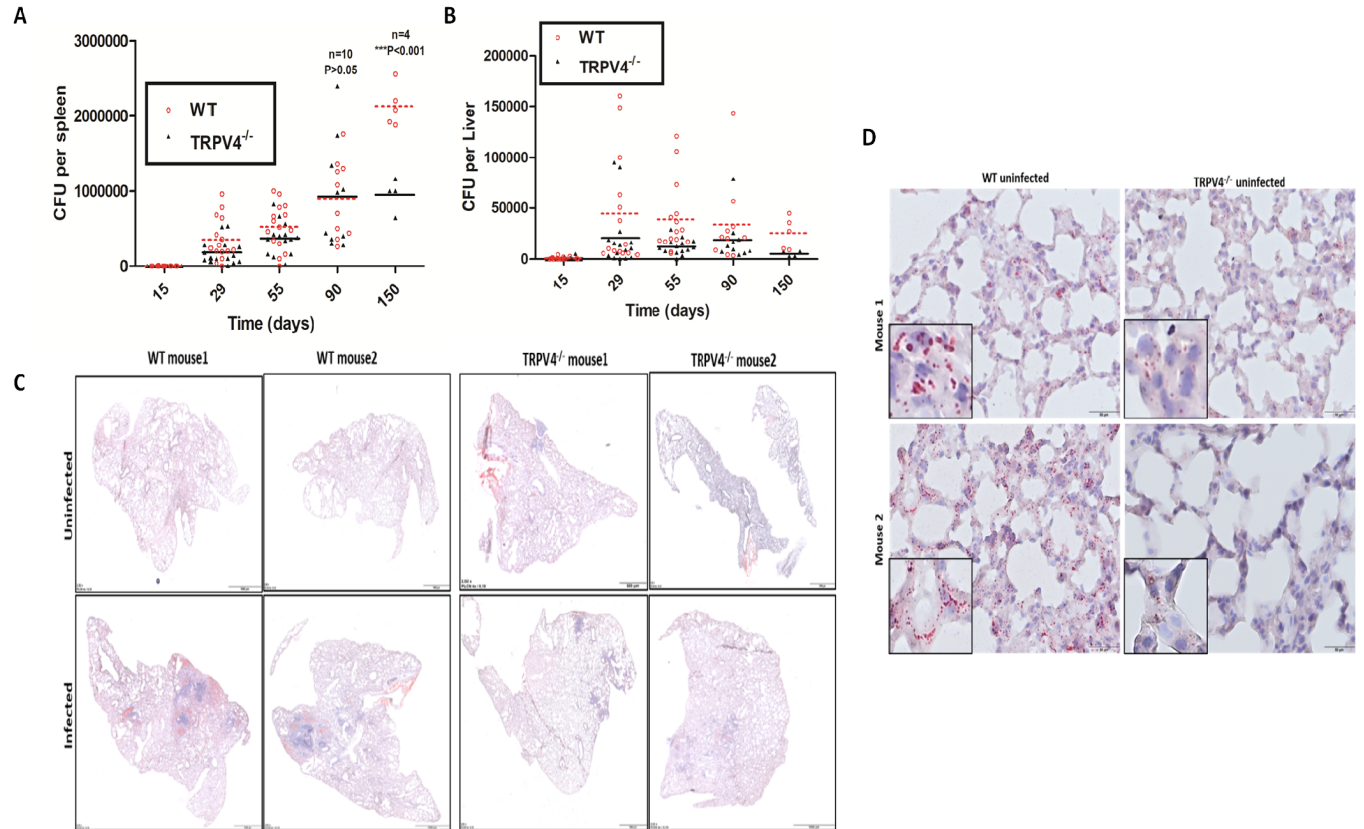

**Figure S3**

(A), (B) *M. tuberculosis* counts from spleen and liver of individual *M. tuberculosis* infected mice at different time points p.i. Data shown are from 3 independent experiments and each point represents one mouse. Statistical analysis was performed with Two Way ANOVA Bonferroni posttests.  $***P < 0.001$ . (C) Complete lung section of uninfected and *M. tuberculosis* infected mice showing oil red O stained lipid bodies (pink) at day 55 p.i. (D) Tissue section showing oil red O positive lipid bodies in uninfected WT and *Trpv4*<sup>-/-</sup> mice. Nuclei = DAPI/blue.

**Figure S4 Related to Figure 5**

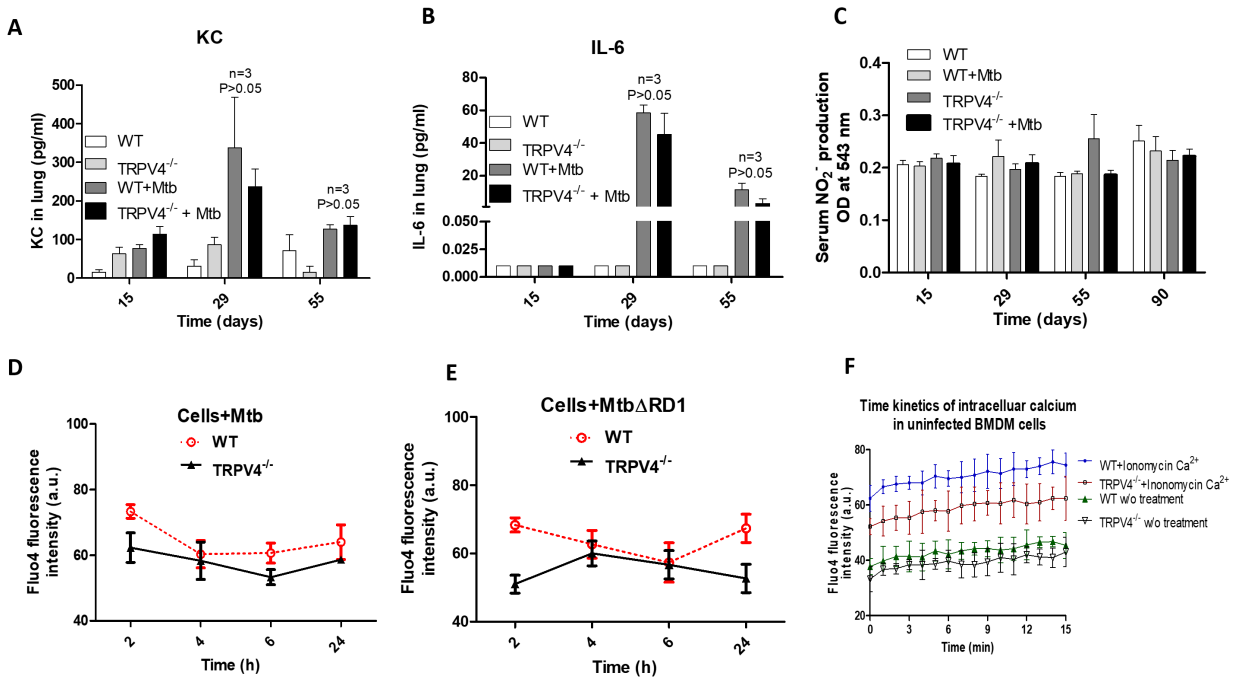

**Figure S4**

(A), (B) Expression of KC and IL-6 in lung lysates from WT and *Trpv4*<sup>-/-</sup> mice at different time points p.i. (C) Nitrite production was measured in lung lysates prepared from *M. tuberculosis* infected WT and *Trpv4*<sup>-/-</sup> mice at indicated time points using Nitrate reductase and Griess reagent. The NO<sub>2</sub><sup>-</sup> production was represented as the absorbance of Griess reagent at 543nm. (D,E) Intracellular calcium levels in *M. tuberculosis* or MtbΔRD1 infected WT and *Trpv4*<sup>-/-</sup> BMDM was measured by incubating the cells with permeable Fluo4AM (4μg/ml) dye for 30 minutes in dark. Fluorescence intensity of Fluo4AM was measured at Ex/Em of 494/506 nm using Biotek multiplate reader. (F) Intracellular calcium level in resting WT and TRPV4<sup>-/-</sup> macrophages in presence of ionomycin Ca<sup>2+</sup>. Statistical analysis was performed with Two Way ANOVA Bonferroni posttests.

## Transparent Methods

### Statement

All experiments and methods were performed in accordance with institutional guidelines and regulations. Animal studies were approved by the Ministry of Energy, Agriculture, Environment, Nature and Digitization of the state of Schleswig-Holstein, Germany [V 242-71197/2017(14-2/18)]. Experiments performed with primary human cells were reviewed and approved by the Ethics Committee of the University of Lübeck, Germany (#13-032). Study with human TB patient samples were approved by the Ethics Committee of the University of Lübeck, Germany (Ethical Approval No.14-032 and #18-194).

### Bacterial strains, Cells and Reagents

*M. tuberculosis* H37Rv, green fluorescent protein (GFP) tagged *M. tuberculosis* (Mtb-GFP), Discosoma Red fluorescent protein (DsRed) expressing *M. tuberculosis*, Region of Difference-1 (RD1) deleted *M. tuberculosis* (Mtb $\Delta$ RD1), Mtb $\Delta$ RD1-GFP and *M. smegmatis* were cultured as described previously (Dallenga et al., 2017). To stabilize GFP and Ds-Red expression, the bacteria were grown in 7H9 media supplemented with hygromycin-B (50  $\mu$ g/ml), kanamycin (20  $\mu$ g/ml) and hygromycin-B (50  $\mu$ g/ml), respectively. Primary antibodies directed against Trpv4 (#ACC034, Alomone lab), Rab5 (#GTX108605, GeneTex), neutrophil elastase (#51-862, proSci-ELAN) were used in this study. Secondary antibodies goat anti rabbit-cy3 (#111-165-144) were procured from Jackson Immunoresearch, UK.

Murine alveolar and peritoneal macrophages from both male and female mice were isolated from broncho-alveolar and peritoneal lavages obtained from C57BL/6J WT or *Trpv4*-knockout (*Trpv4*<sup>-/-</sup>) mice as described previously (Schneider et al., 2014). The isolated cells were suspended

in DMEM medium containing 10 % heat inactivated fetal bovine serum (FBS) and 2 mM L-glutamine, plated ( $1 \times 10^5$  cells per well) on 96-well tissue culture plates and incubated in 5% CO<sub>2</sub> at 37<sup>0</sup>C for at least 3 hours to allow macrophages to adhere.

Bone marrow derived macrophages (BMDM) from both male and female WT or *Trpv4*<sup>-/-</sup> mice were harvested by flushing femurs and tibiae as described previously (Herbst et al., 2011). Harvested cells were differentiated in DMEM containing 10% heat inactivated FBS, 2 mM L-glutamine and L929 cell supernatant (20% v/v) as a source of colony stimulating factor for one week at 37<sup>0</sup>C and 5% CO<sub>2</sub>.

#### **Animal model, *M. tuberculosis* infection and CFU assay**

*Trpv4*<sup>-/-</sup> mice were generated on a C57BL/6J background as described previously (Liedtke and Friedman, 2003). Both WT and *Trpv4*<sup>-/-</sup> mice were bred and housed under specific pathogen free (SPF) condition at the Research Center Borstel-Leibniz Lung Center (RCB). Animal studies were approved by the Ministry of Energy, Agriculture, Environment, Nature and Digitization of the state of Schleswig-Holstein, Germany [V 242-71197/2017(14-2/18)].

For aerosol infection, 6-8 weeks old both male and female mice were infected with *M. tuberculosis*-H37Rv (100 CFU) using an aerosol chamber (GlasCol, USA). After aerosol challenge, bacterial load in lung, spleen and liver was determined at different time points by mechanical disruption of organs in 0.1% v/v tween 80 in milliQ water containing a protease inhibitor cocktail (Roche Diagnostics). Ten-fold serial dilutions of organ homogenates in 0.01% v/v tween 80 and 0.05% w/v albumin were plated onto Middlebrook 7H11 agar plates and colonies were counted after 3-4 weeks of incubation at 37<sup>0</sup> C.

### **Macrophage infection assay**

Bacterial cultures in mid-exponential phase were pelleted, washed with 1X PBS (pH 7.4). Bacterial clumps were removed by passing five times through a 27G blunt needle. *M. tuberculosis*-H37Rv culture at a final optical density of 0.1 at 600 nm (OD<sub>600</sub>), which corresponds to  $5 \times 10^7$  bacteria ml<sup>-1</sup> was prepared with DMEM.  $1 \times 10^5$  macrophages were infected at MOI 1 or otherwise as indicated. For activation of macrophages, cells were incubated overnight with 500 units/ml of IFN- $\gamma$  prior to the infection. After 2 h of infection, cells were washed 3 times with 1X PBS to remove any extracellular bacteria. At different time points p.i., cells were lysed with ice cold 0.5% triton X-100, serially diluted with 1X PBS and plated on 7H11 agar plates. *M. tuberculosis* colonies were enumerated after 3 weeks of incubation at 37<sup>o</sup> C.

### **Isolation of human monocyte-derived macrophages**

Human monocyte-derived macrophages (hMDM) from both male and female donors were generated from peripheral blood mononuclear cells (PBMCs) (purity consistently >92%) by elutriation and differentiated after 7 days in Teflon bag cultures in the presence of 10 ng/ml recombinant human M-CSF (VueLife 72C; Cellgenix, Freiburg, Germany) as described previously (Reiling et al., 2001). All experiments performed with primary human cells were reviewed and approved by the Ethics Committee of the University of Lübeck, Germany (#13-032).

### **Quantitative Real-time PCR**

Total RNA was isolated from macrophages ( $0.2 \times 10^6$ ) using Trizol (peqGOLDTriFast™, USA) according to the manufacturer's instructions. cDNA was synthesized using Maxima First Strand cDNA Synthesis Kit (Thermo Fisher). Gene-specific primers and TaqMan probes (Roche Applied Science, Germany) were designed using Universal Probe Library (UPL) assay design center (ProbeFinder Version 2.45). qRT-PCR was performed using the LightCycler 480 Probe Master



Kit and the LightCycler 480 II system (Roche Applied Science)(Neumann et al., 2010). Crossing point values of target and reference gene were determined by the second derivative maximum method. Relative gene expression was calculated using E-Method ([https://www.nature.com/app\\_notes/nmeth/2006/062706/full/nmeth894.html](https://www.nature.com/app_notes/nmeth/2006/062706/full/nmeth894.html)).

### **Human TB patient samples**

All experiments performed with primary human macrophages or the staining of human lung tissues derived from patients suffering from TB, which underwent surgery for lung tissue resection as part of the anti-TB therapy, were reviewed and approved by the Ethics Committee of the University of Lübeck, Germany (Ethical Approval No.14-032 and #18-194). Lung sections were obtained from both male and female TB patients. Figure 6A,C are samples from male patient and Figure 6B and Figure 7C are samples from female TB patients.

### **Immunofluorescence microscopy**

WT and *Trpv4*<sup>-/-</sup>BMDM ( $1 \times 10^5$ ) were seeded on coverslips and infected with *M. tuberculosis* - GFP or *M. tuberculosis*  $\Delta$ RD1-GFP (MOI 5) as described above. At specific time points, cells were fixed overnight with 4% PFA, washed with 1X PBS, permeabilized with 0.5 % saponin (#558255, Calbiochem) for 10 minutes and then blocked with 10 % goat serum. Cells were then incubated with primary antibodies (Rab5 -5 $\mu$ g/ml; TRPV4- 4 $\mu$ g/ml; Neutrophil elastase- 5 $\mu$ g/ml) for 1h at room temperature followed by washing and fluorophore-conjugated secondary antibody (Goat anti rabbit-cy3 -2.5 $\mu$ g/ml) in dark for 1h each step. DAPI (#D1306, Thermofisher) staining was performed at 1:1000 dilution and incubated in dark for 7 minutes. After mounting, cells were observed under fluorescence microscope (Nikon eclipse Ti) and confocal microscope (Leica TCS SP5). Confocal images were analyzed with IMARIS life-science software. Fluorescence intensities were quantified using Fiji ImageJ software.

### **Phagosomal pH measurement**

Phagosomal pH was measured by ratiometric fluorescence microscopy (Nunes et al., 2015). To this end, *Escherichia coli* (*E. coli*) was first grown till mid-exponential phase and fixed with 4% PFA for 1 h followed by labelling with fluorescence isothiocyanate (FITC) (0.1mg/ml). WT and *Trpv4*<sup>-/-</sup> BMDM (1×10<sup>5</sup> cells) were incubated with FITC labelled *E.coli* (MOI 10) and live cell imaging was performed for 45 minutes at 37°C and 5% CO<sub>2</sub> growth conditions using confocal microscopy. FITC signal was captured at excitation wavelength of 488 nm and 458 nm. Fluorescence property of FITC is quenched by acidic pH when excited at approximately 488 nm but not when excited at 458 nm. The ratio of 488/458 was used to determine the pH of the phagosome. Finally, the observed ratio value was converted into pH value by using an equation  $X=17.5035 \times \{-(y-10.5627)/(y-5843007)\}^{0.0761506748}$  with the help of a standard curve obtained from *E. coli*-FITC 488/458 ratio at different pH (where X=pH value and y=ratio of 488/458). In total, 15 phagosomes were analyzed from three individual biological replicates.

### **Lysotracker staining**

BMDM (1×10<sup>5</sup>/well) were seeded onto cover slips and infected with *M. tuberculosis*-GFP (MOI 5) for 2 h and washed. After 48 h of further incubation, cells were washed and incubated with DMEM containing the acidotropic dye, lysotracker Red (100nM; L12492, Invitrogen), for 1h in dark. Cells were fixed with 4% PFA and observed under confocal microscope with excitation/emission of 647/668nm for lysotracker red.

### **Cell death analysis**

BMDM (1×10<sup>5</sup>/well) were infected with WT or  $\Delta$ RD1 *M. tuberculosis* and necrotic cell death was measured using Sytox green (S7020, Thermo) as per the manufacturer's instruction. Apoptotic cell

death was studied using CellEvent Caspase3/7 green detection kit (C10423, Invitrogen) as per manufacturer's instruction. Briefly, BMDM ( $1 \times 10^5$ ) were seeded on a four chambered tissue culture disc, treated with IFN- $\gamma$  overnight and then infected with *M. tuberculosis*-DsRed at MOI 5. Three hours p.i., cells were washed with 1x PBS to remove extracellular bacteria followed by addition of caspase3/7 green detection reagent (10 $\mu$ M in DMEM media). Live cell imaging was performed till 72 h p.i. using biostation IMq imaging system (Nikon).

### **Determination of NO<sub>2</sub><sup>-</sup> production**

IFN- $\gamma$  activated WT and *Trpv4*<sup>-/-</sup>BMDM ( $1 \times 10^5$ ) were infected with *M. tuberculosis*-H37Rv at MOI 5 for 24 h before supernatants were harvested and developed using Griess reagent and measured at 543nm.

For the measurement of nitrite produced under *in-vivo* conditions, lung lysates and serum were collected from *M. tuberculosis* exposed WT and *Trpv4*<sup>-/-</sup>mice. For serum, blood was collected from inferior vena cava of mice at different time points p.i. and serum was separated using Z-gel tubes (Sarstedt; 41.1500.005) followed by centrifugation at 6000 g for 5 minutes. 40  $\mu$ l of serum or lung lysate samples were incubated with 40  $\mu$ l of reduction reagent (NADPH 1mg ml<sup>-1</sup>; FAD 5mM; KH<sub>2</sub>PO<sub>4</sub> 0.5M, pH 7.5 with 0.25U of nitrate reductase-N7265-Sigma) at 37<sup>o</sup>C for 2 h (Petricevich et al., 2000). After incubation, 80  $\mu$ l of Griess reagent was added and incubated for 15 minutes in dark. OD was measured at 543nm.

### **Western blot analysis**

Macrophage cells ( $1 \times 10^6$ ) were infected with WT and  $\Delta$ RD1 *M. tuberculosis* at MOI 5. Then cells were harvested, lysed in RIPA buffer and electrophoresed to SDS-PAGE and western blotting as described previously (Mohanty et al., 2016). Membranes were then incubated overnight with the

primary anti-Trpv4 antibody (Alomone lab; ACC-034), washed, further incubated with HRP conjugated secondary antibody for 2 h at RT and developed and imaged using chemiluminescence and the ChemiDoc Imaging system (Bio-Rad), respectively.

### **Immunohistochemistry and Histopathology**

Lungs from *M. tuberculosis* infected WT and *Trpv4*<sup>-/-</sup> mice were harvested at different time points, incubated with 4% PFA overnight for fixation and 4 µm tissue sections were prepared. For cryo-sections, PFA fixed tissues were incubated with 1X PBS overnight at 4°C, transferred to increasing concentrations of saccharose (5-20%) and embedded in 20% saccharose/ tissuetek (2:1). 4 µm cryo-sections were prepared with Leica cryostat at -20°C.

Paraffin sections were used for immunohistochemistry by deparaffination of tissue sections and antigen retrieval in citrate buffer (pH 6.0). Endogenous peroxidase was inhibited with H<sub>2</sub>O<sub>2</sub> and blocking was done with 10% serum followed by overnight incubation with primary antibody at 4 °C. Tissue sections were washed 3 times in 1X PBS followed by incubation with biotin conjugated secondary antibody (2.6 µg/ml or 1:500 goat-anti rabbit #111066047, Jackson Labs) for 45 minutes at RT and avidin-biotin complex for 45 minutes at RT (Vectastain Elite ABC-Peroxidase Kit, #VC-PK-6100-KI01). Tissue sections were developed in DAB followed by nuclei staining with hematoxyline. Similar staining procedure was used for immunohistochemistry analysis of human patient suffering from TB lung tissues. For *M. tuberculosis* counts, tissue sections were stained with Ziehl-Neelsen followed by nuclei staining with hematoxylin. Slides were embedded in Entellan.

For lipid staining, lung cryo-sections were washed 3 times with 1X PBS followed by incubation with Oil Red O stain for 30 minutes at room temperature. After incubation, slides were washed 3 times with 1X PBS and the nuclei were counterstained in hematoxylin. Slides were

embedded in Kaiser's Glycerin Gelatine and observed by light microscopy (Olympus BX41). Images were captured with CellSens standard Olympus software.

### **Cytokine and chemokine analysis**

Cytokines and chemokines in mouse lung lysate and serum were analyzed using U-plex MSD kits (#K15069L) and the assay was performed according to the manufacturer's instructions.

### **Intracellular calcium measurement**

BMDM ( $1 \times 10^5$  cells per well) from WT and *Trpv4*<sup>-/-</sup> mouse were seeded in a 96 well plate. Cells were treated with 4 $\mu$ M Ionomycin, 2mM CaCl<sub>2</sub> or infected with *M. tuberculosis*-H37Rv or *M. tuberculosis* $\Delta$ RD1 with a MOI 5. At indicated time points, media were removed and cells were washed twice with 1xPBS. Cells were then incubated with Fluo-4AM (4 $\mu$ g/ml) for 30 minutes at 37 °C in dark, and the fluorescence intensity was obtained at Ex/Em of 494/506 nm using Biotek multiplate reader.

### **Statistical analysis**

Data are presented as mean  $\pm$  standard error mean (SEM). Two-way and One-way analysis of variance was used to determine statistical significance between groups where \*p < 0.05, \*\*p < 0.01, \*\*\*p < 0.001. All statistical significances between the experimental groups are marked.

## KEY RESOURCES TABLE

| REAGENT or RESOURCE                                  | SOURCE                                                              | IDENTIFIER                             |
|------------------------------------------------------|---------------------------------------------------------------------|----------------------------------------|
| <b>Antibodies</b>                                    |                                                                     |                                        |
| TRPV4                                                | Alomone lab                                                         | ACC034                                 |
| Rab5                                                 | GeneTex                                                             | GTX108605                              |
| Neutrophil elastase                                  | proSci-ELAN                                                         | 51-862                                 |
| Goat anti rabbit-cy3                                 | Jackson immunoresearch                                              | 111-165-144                            |
| Goat-anti rabbit biotin conjugated                   | Jackson immunoresearch                                              | 111-066-047                            |
| Goat-anti rabbit HRP conjugated                      | Jackson immunoresearch                                              | 111-035-045                            |
| <b>Bacterial and Virus Strains</b>                   |                                                                     |                                        |
| <i>M. tuberculosis</i> H37Rv                         | Schaible lab, Research Center Borstel, Germany                      | N/A                                    |
| <i>M. tuberculosis</i> H37Rv GFP                     | Tanya Parish, Center for Global Infectious Disease Research Seattle | N/A                                    |
| <i>M. tuberculosis</i> H37Rv ΔRD1                    | Suzanne M. Hingley-Wilson, William R. Jacobs                        | N/A                                    |
| <i>M. tuberculosis</i> H37Rv DsRed                   | Schaible lab, Research Center Borstel, Germany                      | N/A                                    |
| <i>M. smegmatis</i> mc <sup>2</sup> 155              | Schaible lab, Research Center Borstel, Germany                      | N/A                                    |
| <i>E. coli</i>                                       | Schaible lab, Research Center Borstel, Germany                      | N/A                                    |
| <b>Biological Samples / Cell line</b>                |                                                                     |                                        |
| Human TB patient lung sample                         | Luebeck University, Germany                                         | Ethical Approval No.14-032 and #18-194 |
| RAW264.7 mouse macrophages                           | A. Sonawane lab, India                                              | N/A                                    |
| <b>Chemicals, Peptides, and Recombinant Proteins</b> |                                                                     |                                        |
| 7H11 agar media                                      | Difco                                                               | 283810                                 |
| DMEM                                                 | Pan Biotech                                                         | P04-03600                              |
| RPMI                                                 | Pan Biotech                                                         | P04-17500                              |

|                                  |                              |                 |
|----------------------------------|------------------------------|-----------------|
| Kanamycin                        | Roth                         | T832.1          |
| Hygromycin-B                     | Pan Biotech                  | P06-08020       |
| FBS                              | Pan Biotech                  | P30-3306        |
| L-glutamine                      | Pan Biotech                  | P04-80100       |
| Tween-80                         | Roth                         | 4780            |
| Protease inhibitor cocktail      | Roche                        | 4693132001      |
| DAPI                             | Thermofisher                 | D1306           |
| TritonX-100                      | Roth                         | 3051.3          |
| Trizol Tri Reagent               | Zymo Research                | R2050-1-200     |
| Lysotracker red                  | Invitrogen                   | L12492          |
| Caspase 3/7 detection kit        | Invitrogen                   | C10423          |
| FITC                             | Sigma                        | F7250           |
| RN1734                           | Sigma                        | R0658           |
| Recombinant murine IFN- $\gamma$ | Peprotech                    | 315-05          |
| Flou4AM                          | Goswami lab, NISER,<br>India | N/A             |
| Ionomycin                        | Goswami lab, NISER,<br>India | N/A             |
| TB Carbofuchsin                  | BD                           | 212518          |
| Mayer's Haematoxylin             | Roth                         | T865.2          |
| Eosin                            | Roth                         | 7089.2          |
| Entellan                         | VWR                          | 1079610500      |
| Sucrose                          | Roth                         | 9286.1          |
| Tissue tek                       | Leica                        | 020108926       |
| Methylbutane                     | VWR                          | 720-0821        |
| Oil Red O                        | Sigma                        | O0625           |
| Nitrate reductase                | Sigma                        | N7265           |
| NADPH                            | Sigma                        | N7265-2UN       |
| FAD                              | Sigma                        | F6625-10MG      |
| KH <sub>2</sub> PO <sub>4</sub>  | Merck                        | 1.04873.0250    |
| DAB for immunohistochemistry     | Sigma                        | D4293-50SET     |
| Avidin Biotin Complex kit        | Vector lab                   | VC-PK-6100-KI01 |

| <b>Critical Commercial Assays</b>                                        |                            |                                                                                                                       |
|--------------------------------------------------------------------------|----------------------------|-----------------------------------------------------------------------------------------------------------------------|
| MSD kit for cytokine analysis                                            | Meso Scale Discovery       | K15069L                                                                                                               |
| <b>Experimental Models: Organisms/Strains</b>                            |                            |                                                                                                                       |
| TRPV4 <sup>-/-</sup> mouse                                               | Liedtke <i>et al.</i> 2003 | N/A                                                                                                                   |
| <b>Oligonucleotides</b>                                                  |                            |                                                                                                                       |
| Human TRPV4 forward primer for mRNA expression<br>CTCTTCATGATCGGCTACGC   | Roche                      | Probe-54                                                                                                              |
| Human TRPV4 reverse primer for mRNA expression<br>ACACCTTCATGTTGGCACAC   | Roche                      | Probe-54                                                                                                              |
| Human HPRT forward primer for mRNA expression<br>TGACCTTGATTTATTTGCATACC | Roche                      | Probe-73                                                                                                              |
| Human HPRT reverse primer for mRNA expression<br>CGAGCAAGACGTTTCAGTCCT   | Roche                      | Probe-73                                                                                                              |
| <b>Software and Algorithms</b>                                           |                            |                                                                                                                       |
| Imaris 7                                                                 | Bitplane                   | <a href="http://www.bitplane.com/imaris/imaris">http://www.bitplane.com/imaris/imaris</a>                             |
| GraphPad Prism                                                           | GraphPad                   | <a href="https://www.graphpad.com/scientific-software/prism/">https://www.graphpad.com/scientific-software/prism/</a> |
| Graphical abstract                                                       | BioRender                  | Created with BioRender.com                                                                                            |



## Supplemental References

- Dallenga, T., Repnik, U., Corleis, B., Eich, J., Reimer, R., Griffiths, G.W., and Schaible, U.E. (2017). M. tuberculosis-Induced Necrosis of Infected Neutrophils Promotes Bacterial Growth Following Phagocytosis by Macrophages. *Cell Host Microbe* 22, 519-530.e513.
- Herbst, S., Schaible, U.E., and Schneider, B.E. (2011). Interferon gamma activated macrophages kill mycobacteria by nitric oxide induced apoptosis. *PloS one* 6, e19105.
- Liedtke, W., and Friedman, J.M. (2003). Abnormal osmotic regulation in *trpv4*<sup>-/-</sup> mice. *Proceedings of the National Academy of Sciences of the United States of America* 100, 13698-13703.
- Mohanty, S., Dal Molin, M., Ganguli, G., Padhi, A., Jena, P., Selchow, P., Sengupta, S., Meuli, M., Sander, P., and Sonawane, A. (2016). Mycobacterium tuberculosis EsxO (Rv2346c) promotes bacillary survival by inducing oxidative stress mediated genomic instability in macrophages. *Tuberculosis (Edinb)* 96, 44-57.
- Neumann, J., Schaale, K., Farhat, K., Endermann, T., Ulmer, A.J., Ehlers, S., and Reiling, N. (2010). Frizzled1 is a marker of inflammatory macrophages, and its ligand Wnt3a is involved in reprogramming Mycobacterium tuberculosis-infected macrophages. *Faseb j* 24, 4599-4612.
- Nunes, P., Guido, D., and Demaurex, N. (2015). Measuring Phagosome pH by Ratiometric Fluorescence Microscopy. *Journal of visualized experiments : JoVE*, e53402.
- Petricevich, V.L., Teixeira, C.F., Tambourgi, D.V., and Gutierrez, J.M. (2000). Increments in serum cytokine and nitric oxide levels in mice injected with Bothrops asper and Bothrops jararaca snake venoms. *Toxicon : official journal of the International Society on Toxinology* 38, 1253-1266.
- Reiling, N., Blumenthal, A., Flad, H.D., Ernst, M., and Ehlers, S. (2001). Mycobacteria-induced TNF-alpha and IL-10 formation by human macrophages is differentially regulated at the level of mitogen-activated protein kinase activity. *J Immunol* 167, 3339-3345.
- Schneider, B.E., Behrends, J., Hagens, K., Harmel, N., Shayman, J.A., and Schaible, U.E. (2014). Lysosomal phospholipase A2: a novel player in host immunity to Mycobacterium tuberculosis. *European journal of immunology* 44, 2394-2404.
